# Supplementary material
Source: PubMed Central journal article supplement (PMC5766259)
Supplement: NIHMS925546-supplement-Supplemental.pdf [file NIHMS925546-supplement-Supplemental.pdf]

**Boronic Acid Recognition of Non-interacting Carbohydrates for Biomedical Applications:**

**Increasing Fluorescence Signals of Minimally Interacting Aldoses and Sucralose**

Angel Resendez<sup>§</sup>, Md Abdul Halim<sup>‡</sup>, Jasmeet Singh<sup>§</sup>, Dominic-Luc Webb<sup>‡</sup>, Bakthan Singaram<sup>§\*</sup>

*<sup>§</sup> Department of Chemistry and Biochemistry, University of California Santa Cruz, Santa Cruz, CA 95064, United States*

*<sup>‡</sup> Department of Medical Sciences, Gastroenterology and Hepatology Unit, Uppsala University, 751 85, Uppsala, Sweden*

|                                                                                            |           |
|--------------------------------------------------------------------------------------------|-----------|
| 1. Synthesis of Boronic Acid Receptors                                                     | p. S-2    |
| 2. Reaction Optimization for the NaBH <sub>4</sub> Reduction of Aldoses (Figure S-1 & S-2) | p.S-3–S-4 |
| 3. Fluorescence Spectra of Chemically Modified Saccharides (Figure S-3- & S-4)             | p. S-5    |
| 4. <sup>1</sup> H and <sup>13</sup> C NMR spectra (Fig. S-5–S-6)                           | p.S-6–S-7 |
| 5. References                                                                              | p. S-8    |

## 1. Synthesis

The syntheses of 4, 4'-*o*-BBV was synthesized according to previously published procedures.

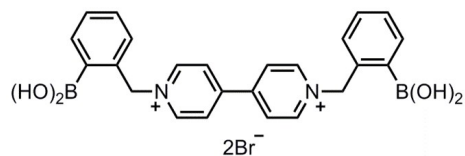

**Preparation of 4,4'-*o*-BBV.**<sup>1</sup> To a solution of 2-bromomethylphenyl boronic acid (0.77 g, 3.6 mmol) in dry MeCN (10 mL), MeOH (0.65 mL) and 4,4'-dipyridyl (0.23 g, 1.5 mmol) was added, and the reaction was stirred at 55 °C for 48 hours. The reaction mixture was cooled to room temperature and acetone (10 mL) was added to induce further precipitation of a pale yellow solid. The precipitate was centrifuged, washed with acetone (2 x 10mL) and dried under a stream of argon (0.85 g, 96%yield). <sup>1</sup>H NMR (500 MHz, D<sub>2</sub>O) δ 9.06 (d, J=10 Hz, 4H), 8.47 (d, J=5 Hz, 4H), 7.79 (d, J=10Hz, 2H), 7.56 (m, 6H), 6.11 (s, 4H); <sup>13</sup>C NMR (126 MHz, D<sub>2</sub>O) δ 146.72, 135.51, 132.80, 130.44, 128.35, 127.85, 66.13; <sup>11</sup>B NMR (160 MHz, D<sub>2</sub>O) δ +29.83.

## 2. Reaction optimization for the NaBH<sub>4</sub> reduction of aldoses

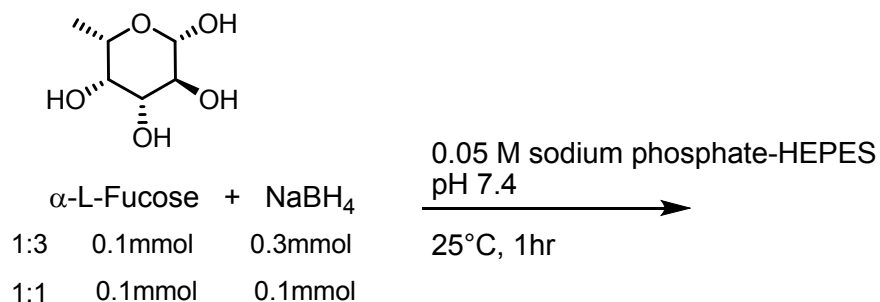

**Scheme S-1.** Reaction conditions used for the reduction of aldoses used to obtain optimal conditions. To Circumvent false positive signals each reaction was performed in 0.05 M sodium phosphate-HEPES buffer to maintain pH of the reaction.

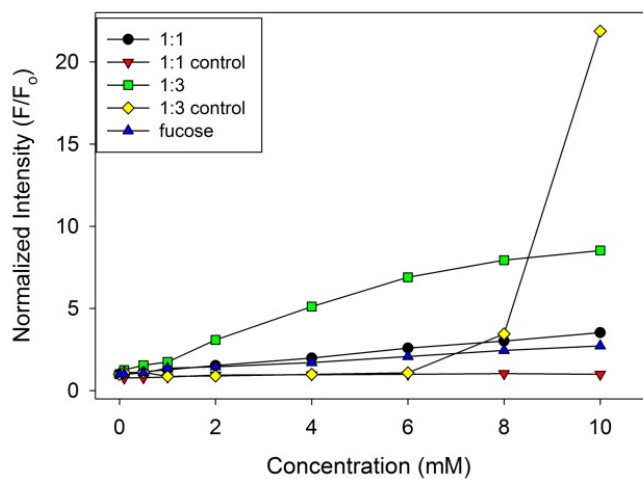

**Figure S-1.** Reaction optimization of NaBH<sub>4</sub> reduction of fucose. Normalized Intensity for the 4,4'-*o*-BBV (400  $\mu$ M) and HPTS (4  $\mu$ M) after each reaction condition. Control is the repeated condition in the absence of fucose.

### Binding constant calculations:

Origin lab software was used to perform the calculation following the Benesi-Hildebrand plot where it is assumed that a 1:1 binding stoichiometry is present.<sup>1,2</sup> The following equation was used

$$\frac{F}{F_0} = \frac{\left(1 + \frac{F_{max}}{F_0}\right) * Kb * A}{1 + Kb * A} \quad \text{and inputted as the following function in origin lab software:} \quad y = \frac{1 + S * K * A}{1 + K * A}$$

where S=maximum possible signal, K=binding constant, A=analyte concentration. K and S are considered the parameter variables and A is the independent variable while y is dependent.

**Table S-1.** Binding constants for each aldose after NaBH4 reduction compared to untreated aldose.

| 4,4'- <i>o</i> -BBV | Reduced Aldose (Binding constant M <sup>-1</sup> ) | Aldose (Binding constant M <sup>-1</sup> ) |
|---------------------|----------------------------------------------------|--------------------------------------------|
| Fucose              | 21 ± 2.6                                           | 5.2 ± 2.0                                  |
| Rhamnose            | 67 ± 6.2                                           | 9.5 ± 1.5                                  |
| Xylose              | 52 ± 8.5                                           | 2.08 ± 0.4                                 |

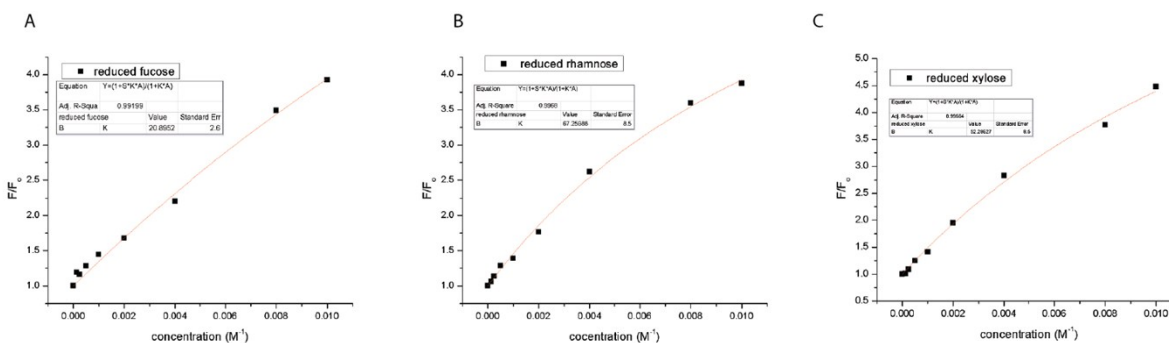

**Figure S2.** Non-linear fitted binding isotherms to obtain binding constants for reduced fucose (a) rhamnose (b) and xylose (c).

**Table S-2.** Limit of detection and quantification for reduced aldose versus unreacted aldose with 4,4'-*o*-BBV.

| 4,4'- <i>o</i> -BBV | Reduced Aldose (LOD, LOQ μM) | Aldose (LOD, LOQ mM) |
|---------------------|------------------------------|----------------------|
| Fucose              | 175,560                      | 1.5, ND              |
| L-rhamnose          | 250,550                      | 1, ND                |
| Xylose              | 260,475                      | 2, 6                 |

ND: not determined

### 3. Fluorescence Spectra of Chemically Modified Saccharides

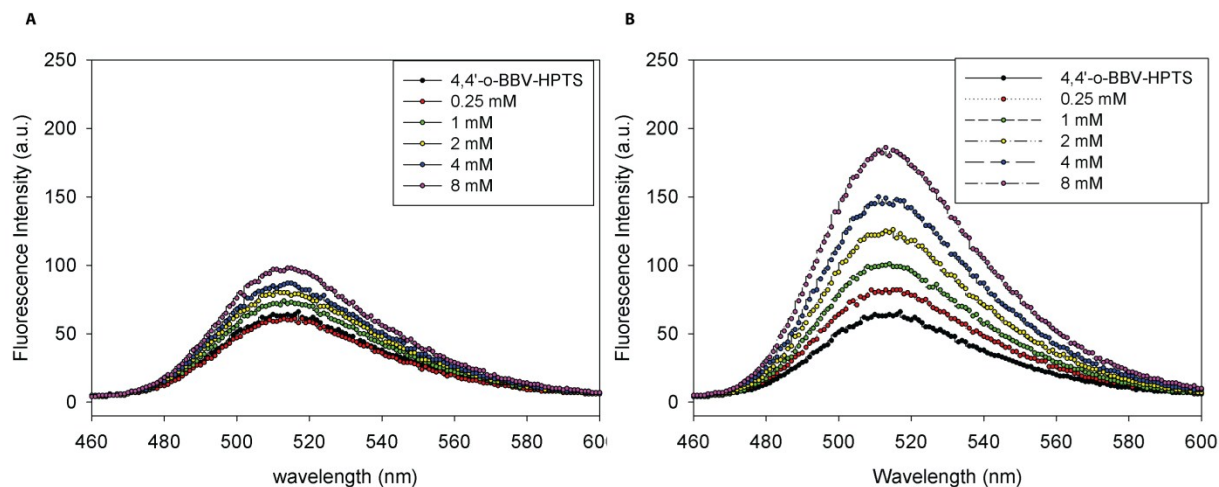

**Figure S-3.** Recognition of xylose (A) compared to reduced xylose (B) of 4,4'-o-BBV (400 $\mu$ M) with HPTS in pH 7.4 phosphate buffer,  $\lambda_{\text{ex}}=405$  nm, emission scan 450-600 nm. Change in fluorescence spectrum of HPTS (4 $\mu$ M) in the presence of 4,4'-o-BBV (400 $\mu$ M) upon addition of various concentrations of aldose or reduced aldose.

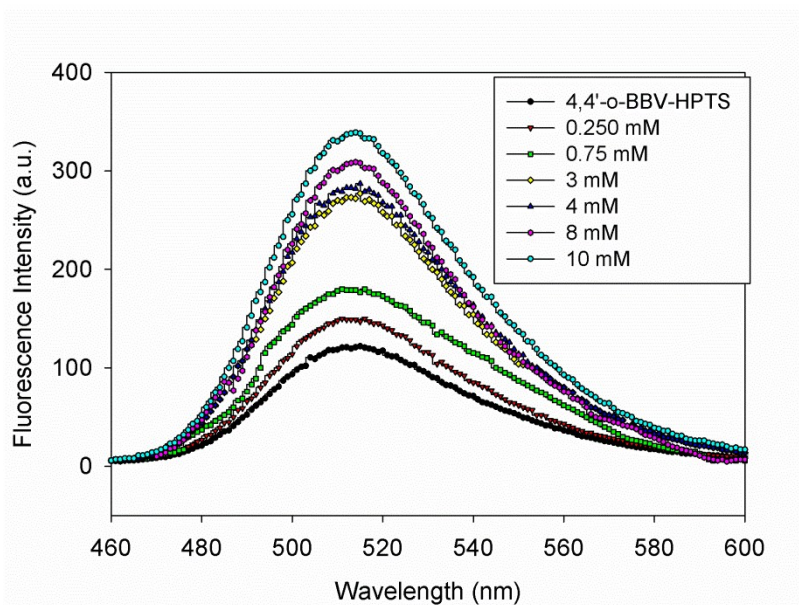

**Figure S-4.** Recognition of modified sucralose of 4,4'-o-BBV (400 $\mu$ M) with HPTS in pH 7.4 phosphate buffer,  $\lambda_{\text{ex}}=405$  nm, emission scan 450-600 nm. Change in fluorescence spectrum of HPTS (4 $\mu$ M) in the presence of 4,4'-o-BBV (400 $\mu$ M) upon addition of various concentrations of modified sucralose.

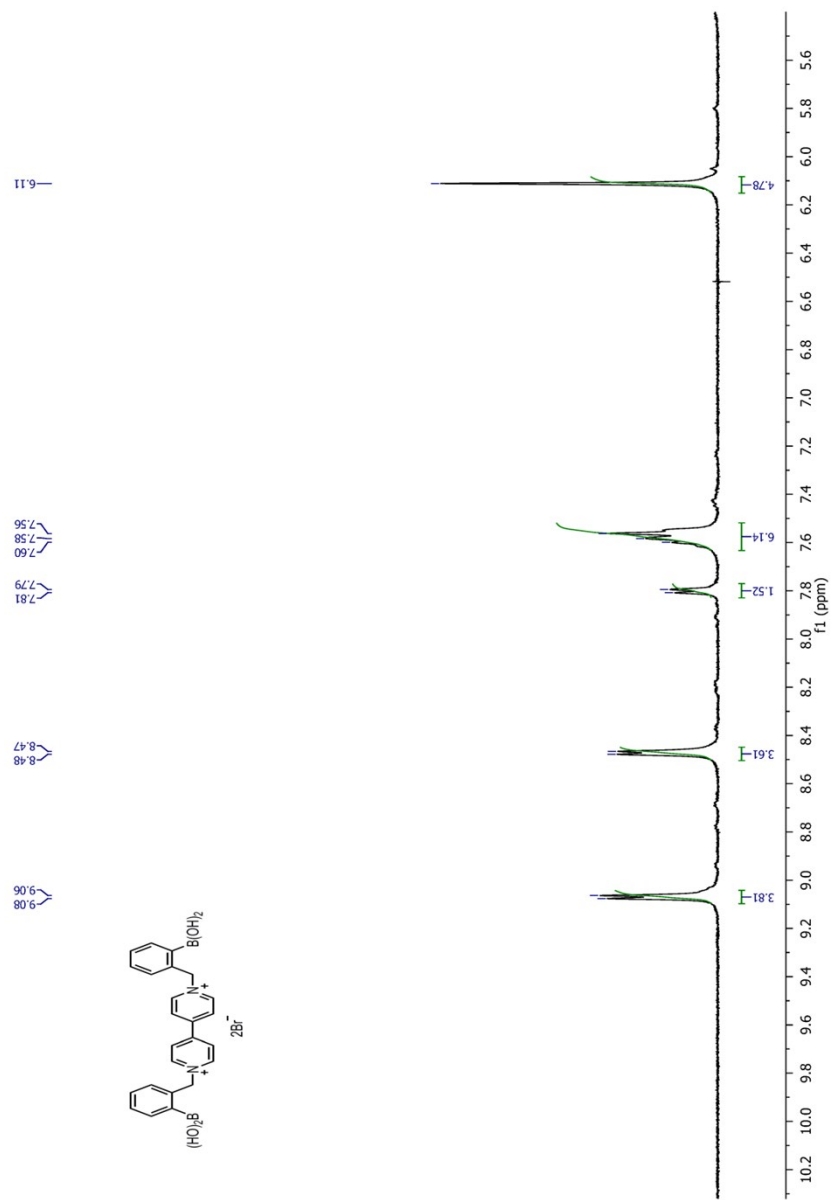

Figure S-5. <sup>1</sup>H NMR of 4,4'-*o*-BBV

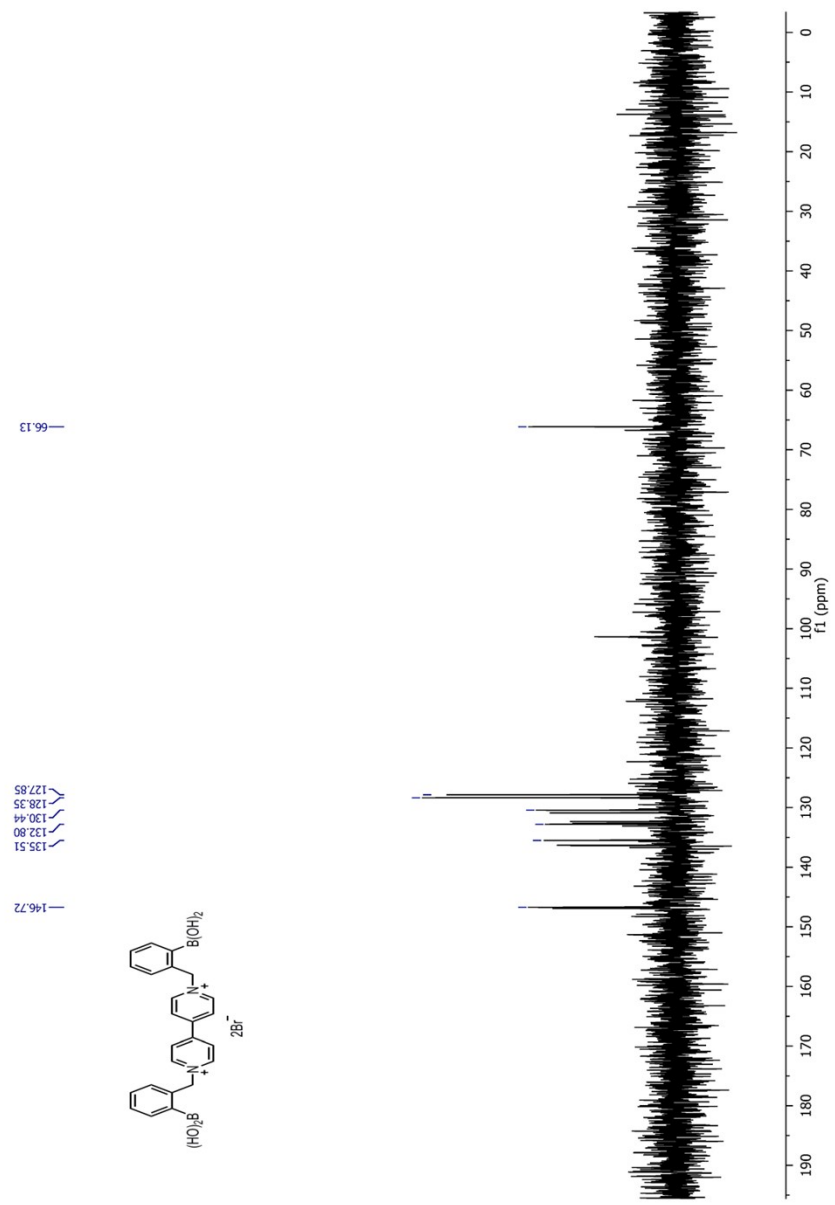

Figure S-6.  $^{13}C$  NMR of 4,4'-o-BBV

#### 4. References

1. Connors, K. A., *Binding Constants-The Measurement of Molecular Complex Stability*, John Wiley: New York, 1987.
2. S. Feryforques, M. T. Lebris, J. P. Guette and B. Valeur, *J. Phys. Chem.*, 1988, **92**, 6233-6237.
